# Supplementary material for: Release-dependent feedback inhibition by a presynaptically localized ligand-gated anion channel
Source: eLife journal article supplement (doi:10.7554/elife.21734), 2016-10-26

Figure 5-figure supplement 1

A

| Genotype                                     | Body posture & locomotion      |
|----------------------------------------------|--------------------------------|
| <i>lgc-46(gf)III</i>                         | Curly, Slow                    |
| <i>lgc-46(gf)III; acc-1(tm3268)IV</i>        | Curly, Slow                    |
| <i>lgc-46(gf)III; acc-2(ok2216)IV</i>        | Curly, Slow                    |
| <i>lgc-46(gf)III; acc-3(tm3174)IV</i>        | Curly, Slow                    |
| <b><i>lgc-46(gf)III acc-4(ok2371)III</i></b> | <b>Superficially wild type</b> |
| <i>lgc-46(gf)III; lgc-47(ok2963)X</i>        | Curly, Slow                    |
| <i>lgc-46(gf)III; lgc-48(gk961621)V</i>      | Curly, Slow                    |
| <i>lgc-46(gf)III; lgc-49(tm6556)V</i>        | Curly, Slow                    |

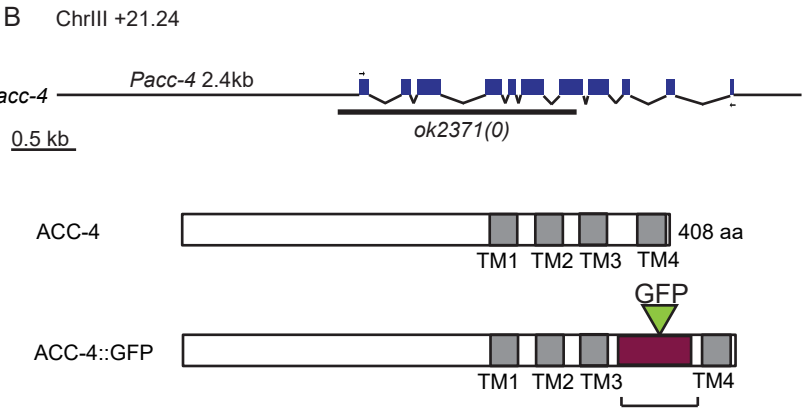

Supplement: supp [file elife_poa_e21734_Figure_5_figure_supplement_1.pdf › elife_poa_e21734_Figure_5_figure_supplement_1.pdf]
