# Supplementary material for: Release-dependent feedback inhibition by a presynaptically localized ligand-gated anion channel
Source: eLife journal article supplement (doi:10.7554/elife.21734), 2016-10-26
Supplement: supp [file elife_poa_e21734_Supplementary_File_2.xlsx]

## Sheet: Sheet1
Table S2. List of constructs used in the study.
Number	Plasmid	Promoter drives expression in:	Construction notes
pCZGY2810	Plgc-46::GFP	Neurons including cholinergic motor neurons (See text)	1.6kb upstream of lgc-46 with first two amino acid coding region was amplified using following primers: YJ11735 CATCGACACCCTCACCCAATC YJ11736 TTGCATTGATGCATCCGTGTC. Promoter was cloned into GFP expressing construct backbone by Gibson assembly.
pCZGY2811	Plgc-46DEST	-	1.6kb upstream of lgc-46 was cloned into Gateway destination vector. pCZGY2810 was used as the template to amplify promoter region with YJ11737 and YJ11738.
pCZGY2812	PCR8-LGC-46(WT)	-	lgc-46 cDNA was amlified using the following primers: YJ11741 ATGCAATATCTGCAATTCCT and YJ11742 TTATATTTATTATCATTCGTTGACTAG. cDNA genrated from N2 wild type was used as the template. The amplified fragment was cloned into Gateway PCR8 vector.
pCZGY2813	PCR8-LGC-46(M314I)	-	lgc-46(M314I) cDNA was amplified using YJ11741 and YJYJ11742. cDNA generated from lgc-46(ju825)III: acr-2(n2420)X was used as the templated. The amplified fragment was cloned into Gateway PCR8 vector.
pCZGY2814	Plgc-46::LGC-46(WT)	Neurons including cholinergic motor neurons (See text and Extended Data Fig. 1d)	LR reaction between pCZGY2811 and pCZGY2812
pCZGY2815	Plgc-46::LGC-46(M314I)	Neurons including cholinergic motor neurons (See text and Extended Data Fig. 1d)	LR reaction between pCZGY2811 and pCZGY2813
pCZGY2816	Prgef-1::LGC-46(WT)	Pan-neuron[1]	LR reaction between Prgef-1 destination vector (pCZGY66) and pCZGY2812
pCZGY2817	Prgef-1::LGC-46(M314I)	Pan-neuron[1]	LR reaction between Prgef-1 destination vector (pCZGY66) and pCZGY2813
pCZGY2818	Punc-17β::LGC-46(WT)	Cholinergic motor neuron[2]	LR reaction between Punc-17β destination vector (pCZGY1091) and pCZGY2812
pCZGY2819	Punc-17β::LGC-46(M314I)	Cholinergic motor neuron[2]	LR reaction between Punc-17β destination vector (pCZGY1091) and pCZGY2813
pCZGY2820	Punc-25::LGC-46(WT)	GABAergic motor neuron[3]	LR reaction between Punc-25 destination vector (pCZGY80) and pCZGY2812
pCZGY2821	Punc-25::LGC-46(M314I)	GABAergic motor neuron[3]	LR reaction between Punc-25 destination vector (pCZGY80) and pCZGY2813
pCZGY2822	Pmyo-3::LGC-46(WT)	Body wall muscle[4]	LR reaction between Pmyo-3 destination vector (pCZGY925) and pCZGY2812
pCZGY2823	Pmyo-3::LGC-46(M314I)	Body wall muscle[4]	LR reaction between Pmyo-3 destination vector (pCZGY925) and pCZGY2813
pCZGY2826	PCR8-LGC-46(WT)::GFP	-	GFP coding sequence was inserted after His396 of pCZGY2812 PCR8-lgc-46(wt) by Gibson assembly.
pCZGY2827	PCR8-LGC-46(M314I)::GFP	-	GFP coding sequence was inserted after His396 of pCZGY2813 PCR8-lgc-46(M314I) by Gibson assembly.
pCZGY2828	Punc-17β-LGC-46(WT)::GFP	Cholinergic motor neuron[2]	LR reaction between Punc-17β destination vector (pCZGY1091) and pCZGY2816
pCZGY2829	Punc-17β-LGC-46(M314I)::GFP	Cholinergic motor neuron[2]	LR reaction between Punc-17β destination vector (pCZGY1091) and pCZGY2817
pCZGY2830	Pitr-1-LGC-46(WT)::GFP	DA9 cholinergic motor neuron[5]	LR reaction between Pitr-1 destination vector (pCZGY2259) and pCZGY2816
pCZGY2831	Pitr-1-LGC-46(M314I)::GFP	DA9 cholinergic motor neuron[5]	LR reaction between Pitr-1 destination vector (pCZGY2259) and pCZGY2817
pCZGY2834	Punc-17β-LGC-46(WT)::GFP_attL	Cholinergic motor neuron[2]	attL sites were added to pCZGY2828 by Gibson assembly. For single copy insertion
pCZGY2835	Punc-17β-LGC-46(M314I)::GFP_attL	Cholinergic motor neuron[2]	attL sites were added to pCZGY2829 by Gibson assembly. For single copy insertion
pCZGY2836	ChrIV_Punc-17β-LGC-46(WT)::GFP	Cholinergic motor neuron[2]	LR reaction between pCFJ201[7] with hygromycin resistant gene added, and pCZGY2834
pCZGY2837	ChrIV_Punc-17β-LGC-46(M314I)::GFP	Cholinergic motor neuron[2]	LR reaction between pCFJ201[7] with hygromycin resistant gene added, and pCZGY2835
PCZGY1008	Pacr-2-RAB-3::mCherry	Cholinergic motor neuron[6]	LR reaction between pCZGY410 and pCZGY846
pCZGY2864	PCR8-acc-4cDNA	-	acc-4(cDNA) was amplified using YJ11811 ATGCGACTAATCATATTAGTAATCTCCATTC and YJ11812 CTTAGATAGTTCTAACCAATAGTTTTCCGAG. Cloned into Topo PCR8 vector.
pCZGY2865	Punc-17β-acc-4cDNA	Cholinergic motor neuron[2]	LR reaction between Punc-17β destination vector (pCZGY1091) and pCZGY2864
pCZGY3110	Punc-17β-ACC-4::GFP	Cholinergic motor neuron[2]	Gibson assembly to assemble Punc-17β-ACC-4, LGC-46 intracellular loop 3, and GFP.
pCZGY2866	PCR8-acc-4genomic	-	acc-4 proromoter and genomic region was amplified using YJ11813 TTCTGAGTATGTGGGAAGGATGG and YJ11814 CGTGAAACATGACAAATGCGAG. Cloned into Topo PCR8 vector.
pCZGY3004	PCR8-LGC-46(P301Δ A302E M314I)	-	Site directed mutagenesis kit (NEB) was used to edit amino acid sequences using pCZGY2864 as template.
pCZGY3005	Punc-17β-LGC-46(P301Δ A302E M314I)	Cholinergic motor neuron[2]	LR reaction between Punc-17β destination vector (pCZGY1091) and pCZGY3004
References
[1]	Altun-Gultekin et al. 2001
[2]	Charlie et al. 2006
[3]	Jin et al. 1999
[4]	Okkema et al. 1993
[5]	Klassen & Shen, 2007
[6]	Jospin et al. 2009
[7]	Frøkjær-Jensen et al. 2012
