# Supplementary material for: Release-dependent feedback inhibition by a presynaptically localized ligand-gated anion channel
Source: eLife. 2016 Oct 26;5:e21734. doi: 10.7554/eLife.21734 (PMC5102579; doi:10.7554/eLife.21734)
Supplement: Supplementary file 1. — DOI: http://dx.doi.org/10.7554/eLife.21734.012 [file elife-21734-supp1.xlsx]

## Sheet: Sheet1
Strain number	Genotype	Allele or transgene information	Used in :	Notes
N2	Wild type		Fig. 2, Fig. 3ac, Fig. 4, Extended Data Fig. 2, Extended Data Fig. 4, Extended Data Fig. 7
MT6242	acr-2(n2420) X	n2420: g925a V309M13	Fig. 3ab, Extended Data Fig. 2cd, Extended Data Fig. 5e, Extended Data Fig. 6
CZ21292	lgc-46(ju825) III ; acr-2(n2420) X	ju825: g942a M314I	Fig. 3ab, Extended Data Fig. 2cd
CZ21630	lgc-46(ju825) III		Fig. 3c, Fig. 4, Extended Data Fig. 7
CZ23071	lgc-46(ok2900) III	ok2900: 709 bp deletion	Fig. 2, Fig. 3ac, Extended Data Fig. 2ab, Extended Data Fig. 4	4x outcrossed
CZ21932	lgc-46(ok2949) III	ok2949: 492 bp deletion and 18 bp insertion	Extended Data Fig. 2ab	3x outcrossed
CZ22518	lgc-46(ok2900)III; acr-2(n2420)X		Fig. 3ac, Extended Data Fig. 2cd
CZ22048	lgc-46(ok2949)III; acr-2(n2420)X		Fig. 3a
CZ22521	acr-2(n2420) X ; Plgc-46::lgc-46(wt)(juEx6858)	juEx6858: Plgc-46-LGC-46(WT) (pCZGY2814) 5ng/µl, Pmyo-2-mCherry 1ng/µl	Fig. 3a
CZ22522	acr-2(n2420) X ; Plgc-46::lgc-46(M314I)(juEx6859)	juEx6859: Plgc-46-LGC-46(M314I)(pCZGY2815) 5ng/µl, Pmyo-2-mCherry 1ng/µl	Fig. 3a
CZ19768	Plgc-46-GFP(juEx6783)	juEx6859: Plgc-46-GFP(pCZGY2810) 20ng/µl, Pmyo-2-mCherry 1ng/µl	Extended Data Fig. 1d
CZ22745	Plgc-46-LGC-46(WT)(juEx6858)		Fig. 3a
CZ23607	Plgc-46-LGC-46(M314I)(juEx6859)		Fig. 3a
CZ22372	Pttr-39-mCherry(juIs223); Plgc-46-GFP(juEx6783)		Extended Data Fig. 1e
CZ22373	Punc-17-mCherry(nuIs321); Plgc-46-GFP(juEx6783)		Extended Data Fig. 1e
CZ21820	acr-2(n2420) X ; Prgef-1-LGC-46(WT)(juEx6612)	juEx6612: Prgef-1-LGC-46(WT)(pCZGY2816) 20ng/µl, Punc-122:-RFP 20ng/µl	Fig. 3b
CZ21823	acr-2(n2420) X ; Prgef-1-LGC-46(M314I)(juEx6615)	juEx6615: Prgef-1-LGC-46(WT)(pCZGY2817) 20ng/µl, Punc-122-RFP 20ng/µl	Fig. 3b
CZ21826	acr-2(n2420) X ; Pmyo-3-LGC-46(WT)(juEx6618)	juEx6618: Pmyo-3-LGC-46(WT)(pCZGY2822) 20ng/µl, Punc-122-RFP 20ng/µl	Fig. 3b
CZ21829	acr-2(n2420) X ; Pmyo-3-LGC-46(M314I)(juEx6621)	juEx6621: Pmyo-3-LGC-46(M314I)(pCZGY2823) 20ng/µl, Punc-122-RFP 20ng/µl	Fig. 3b
CZ21942	acr-2(n2420) X ; Punc-25-LGC-46(wt)(juEx6637)	juEx6637: Punc-25-LGC-46(WT)(pCZGY2820) 20ng/µl, Punc-122-RFP 20ng/µl	Fig. 3b
CZ21944	acr-2(n2420) X ; Punc-25-LGC-46(M314I)(juEx6638)	juEx6638: Punc-25-LGC-46(M314I)(pCZGY2821) 20ng/µl, Punc-122-RFP 20ng/µl	Fig. 3b
CZ21947	acr-2(n2420) X ; Punc-17β-LGC-46(wt)(juEx6641)	juEx6641: Punc-17β-LGC-46(WT)(pCZGY2818) 20ng/µl, Punc-122-RFP 20ng/µl	Fig. 3b, Extended Data Fig. 6
CZ21949	acr-2(n2420) X ; Punc-17β-LGC-46(M314I)(juEx6643)	juEx6643: Punc-17β-LGC-46(M314I)(pCZGY2819) 20ng/µl, Punc-122-RFP 20ng/µl	Fig. 3b
CZ23870	acr-2(n2420) X ; Punc-17β-LGC-46(PAR motif edited, M314I)(juEx7274)	juEx7274: Punc-17β-LGC-46(P301Δ A302E M314I)(pCZGY) 20ng/µl , Pmyo-2-mCherry 1ng/µl	Extended Data Fig. 6
CZ23482	Punc-17β-LGC-46(WT)::GFP(juSi295) IV	juSi295: Punc-17β-LGC-46(WT)::GFP single copy inserted at ChrIV site cxTi10882	Fig. 1c, f
CZ21485	Punc-17β-LGC-46(M314I)::GFP(juSi282)IV	juSi282: Punc-17β-LGC-46(M314I)::GFP single copy inserted at ChrIV site cxTi10882	Extended Data Fig. 5ad
CZ23969	lgc-46(ok2900)III; Punc-17β-LGC-46(WT)::GFP(juEx7333)	juEx7333: Punc-17β-LGC-46(WT)::GFP(pCZGY2828) 5ng/µl, Pmyo-2-mCherry 1ng/µl	Fig. 2, Extended Data Fig. 2a, Extended Data Fig. 4
CZ23492	lgc-46(ok2900)III; Punc-17β::LGC-46(M314I)(juEx6945)	juEx6945:: Punc-17β::LGC-46(M314I)(pCZGY2819) 5ng/µl, Pmyo-2-mCherry 1ng/µl	Extended Data Fig. 2a
CZ23503	lgc-46(ok2900)III; Plgc-46-LGC-46(WT)(juEx6858)		Fig. 3c
CZ23504	lgc-46(ok2900)III; Plgc-46-LGC-46(M314I)(juEx6859)		Fig. 3c, Fig. 4, Extended Data Fig. 7
CZ22616	lgc-46(ju825) III ; acc-1(tm3268) IV	tm3268: 241 bp deletion and 4 bp insertion	Extended Data Fig. 8a
CZ22617	lgc-46(ju825) III ; acc-2(ok2216) IV	ok2216: 1749 bp deletion and 14 bp insertion	Extended Data Fig. 8a
CZ22809	lgc-46(ju825) III ; acc-3(tm3174) X	tm3174: 283 bp deletion	Extended Data Fig. 8a
CZ23751	lgc-46(ju825) III acc-4(ok2371)III	ok2371: 1981 bp deletion	Extended Data Fig. 8a
CZ20425	lgc-46(ju825)III; lgc-47(ok2963)X	ok2963: 521 bp deletion	Extended Data Fig. 8a
CZ23703	lgc-46(ju825)III; lgc-49(tm6556)V	tm6556: 725 bp deletion	Extended Data Fig. 8a
CZ23809	lgc-46(ju825)III; lgc-48(gk961621)V	gk961621: 212 bp deletion	Extended Data Fig. 8a
CZ23752	lgc-46(ju825) acc-4(ok2371)III; acr-2(n2420)X		Extended Data Fig. 8c
CZ23180	acc-4(ok2371)III; acr-2(n2420)		Extended Data Fig. 8c
CZ23179	lgc-46(ok2900)III acc-4(ok2371)III; acr-2(n2420)		Extended Data Fig. 8c
CZ23790	lgc-46(ju825) acc-4(ok2371)III; acr-2(n2420)X; Pacc-4-acc-4(genomic)(juEx7251)	juEx7251: Pacc-4-acc-4(genomic)(pCZGY2866) 5ng/µl, Pmyo-2::mCherry 1ng/µl	Extended Data Fig. 8c
CZ23788	lgc-46(ju825) acc-4(ok2371)III; acr-2(n2420)X; Punc-17β-acc-4cDNA(juEx7249)	juEx7249: Punc-17β-acc-4cDNA(pCZGY2865) 5ng/µl, Pmyo-2::mCherry 1ng/µl	Extended Data Fig. 8c
CZ19997	Punc-129-RAB-3::mCherry(tauIs46)		Extended Data Fig. 3
CZ23973	lgc-46(ok2900)III; Punc-129-RAB-3::mCherry(tauIs46)		Extended Data Fig. 3
CZ23974	lgc-46(ju825)III; Punc-129-RAB-3::mCherry(tauIs46)		Extended Data Fig. 3
CZ24071	acc-4(ok2371)III; Punc-17b-LGC-46(WT)::GFP(juSi295)IV		Extended Data Fig. 8d
CZ24073	acc-4(ok2371)III; Punc-17b-LGC-46(M314I)::GFP(juSi282)IV		Extended Data Fig. 8d
CZ22502	Pitr-1-LGC-46(WT)::GFP(juEx6843)	juEx6843: Pitr-1-LGC-46(WT)::GFP(pCZGY2830) 5ng/µl, Pmyo-2::mCherry 1ng/µl	Fig. 1d
CZ22504	Pitr-1-LGC-46(M314I)::GFP(juEx6845)	juEx6845: Pitr-1-LGC-46(M314I)::GFP(pCZGY2831) 5ng/µl, Pmyo-2::mCherry 1ng/µl	Extended Data Fig. 5b
CZ23594	Punc-17β-LGC-46(WT)::GFP(juSi295)IV; acr-2(n2420)X		Extended Data Fig. 5e
CZ23489	Punc-17β-LGC-46(M314I)::GFP(juSi282)IV; acr-2(n2420)X		Extended Data Fig. 5e
CZ23753	Punc-17β-LGC-46(WT)::GFP(juSi295)IV; Pacr-2-RAB-3::mCherry(juEx7053)	juEx7053: Pacr-2-RAB-3::mCherry(pCZGY1008) 5ng/µl, Pmyo-2::mCherry 1ng/µl	Fig. 1e
CZ23810	Punc-17β-LGC-46(M314I)::GFP(juSi282)IV; Pacr-2::RAB-3::mCherry(juEx7053)		Extended Data Fig. 5c
Information on tm, ok and gk alleles came from Ref. 34 www.wormbase.org and Ref. 35 www.cbs.umn.edu/CGC/
13	Jospin, M. et al. A neuronal acetylcholine receptor regulates the balance of muscle excitation and inhibition in Caenorhabditis elegans. PLoS Biol 7, e1000265, doi:10.1371/journal.pbio.1000265 (2009).

## Sheet: Sheet2
Table S1. List of strains used in the study.
Strain number	Genotype	Allele or transgene information
N2	Wild type
MT6242	acr-2(n2420) X	n2420: g925a V309M(Jospin et al. 2009)
CZ21292	lgc-46(ju825) III ; acr-2(n2420) X	ju825: g942a M314I
CZ21630	lgc-46(ju825) III
CZ23071	lgc-46(ok2900) III	ok2900: 709 bp deletion
CZ21932	lgc-46(ok2949) III	ok2949: 492 bp deletion and 18 bp insertion
CZ22518	lgc-46(ok2900)III; acr-2(n2420)X
CZ22048	lgc-46(ok2949)III; acr-2(n2420)X
CZ22521	acr-2(n2420) X ; Plgc-46::lgc-46(wt)(juEx6858)	juEx6858: Plgc-46-LGC-46(WT) (pCZGY2814) 5ng/µl, Pmyo-2-mCherry 1ng/µl
CZ22522	acr-2(n2420) X ; Plgc-46::lgc-46(M314I)(juEx6859)	juEx6859: Plgc-46-LGC-46(M314I)(pCZGY2815) 5ng/µl, Pmyo-2-mCherry 1ng/µl
CZ19768	Plgc-46-GFP(juEx6783)	juEx6859: Plgc-46-GFP(pCZGY2810) 20ng/µl, Pmyo-2-mCherry 1ng/µl
CZ22745	Plgc-46-LGC-46(WT)(juEx6858)
CZ23607	Plgc-46-LGC-46(M314I)(juEx6859)
CZ22372	Pttr-39-mCherry(juIs223); Plgc-46-GFP(juEx6783)
CZ22373	Punc-17-mCherry(nuIs321); Plgc-46-GFP(juEx6783)
CZ21820	acr-2(n2420) X ; Prgef-1-LGC-46(WT)(juEx6612)	juEx6612: Prgef-1-LGC-46(WT)(pCZGY2816) 20ng/µl, Punc-122:-RFP 20ng/µl
CZ21823	acr-2(n2420) X ; Prgef-1-LGC-46(M314I)(juEx6615)	juEx6615: Prgef-1-LGC-46(WT)(pCZGY2817) 20ng/µl, Punc-122-RFP 20ng/µl
CZ21826	acr-2(n2420) X ; Pmyo-3-LGC-46(WT)(juEx6618)	juEx6618: Pmyo-3-LGC-46(WT)(pCZGY2822) 20ng/µl, Punc-122-RFP 20ng/µl
CZ21829	acr-2(n2420) X ; Pmyo-3-LGC-46(M314I)(juEx6621)	juEx6621: Pmyo-3-LGC-46(M314I)(pCZGY2823) 20ng/µl, Punc-122-RFP 20ng/µl
CZ21942	acr-2(n2420) X ; Punc-25-LGC-46(wt)(juEx6637)	juEx6637: Punc-25-LGC-46(WT)(pCZGY2820) 20ng/µl, Punc-122-RFP 20ng/µl
CZ21944	acr-2(n2420) X ; Punc-25-LGC-46(M314I)(juEx6638)	juEx6638: Punc-25-LGC-46(M314I)(pCZGY2821) 20ng/µl, Punc-122-RFP 20ng/µl
CZ21947	acr-2(n2420) X ; Punc-17β-LGC-46(wt)(juEx6641)	juEx6641: Punc-17β-LGC-46(WT)(pCZGY2818) 20ng/µl, Punc-122-RFP 20ng/µl
CZ21949	acr-2(n2420) X ; Punc-17β-LGC-46(M314I)(juEx6643)	juEx6643: Punc-17β-LGC-46(M314I)(pCZGY2819) 20ng/µl, Punc-122-RFP 20ng/µl
CZ23870	acr-2(n2420) X ; Punc-17β-LGC-46(PAR motif edited, M314I)(juEx7274)	juEx7274: Punc-17β-LGC-46(P301Δ A302E M314I)(pCZGY) 20ng/µl , Pmyo-2-mCherry 1ng/µl
CZ23482	Punc-17β-LGC-46(WT)::GFP(juSi295) IV	juSi295: Punc-17β-LGC-46(WT)::GFP single copy inserted at ChrIV site cxTi10882
CZ21485	Punc-17β-LGC-46(M314I)::GFP(juSi282)IV	juSi282: Punc-17β-LGC-46(M314I)::GFP single copy inserted at ChrIV site cxTi10882
CZ23969	lgc-46(ok2900)III; Punc-17β-LGC-46(WT)::GFP(juEx7333)	juEx7333: Punc-17β-LGC-46(WT)::GFP(pCZGY2828) 5ng/µl, Pmyo-2-mCherry 1ng/µl
CZ23492	lgc-46(ok2900)III; Punc-17β::LGC-46(M314I)(juEx6945)	juEx6945:: Punc-17β::LGC-46(M314I)(pCZGY2819) 5ng/µl, Pmyo-2-mCherry 1ng/µl
CZ23503	lgc-46(ok2900)III; Plgc-46-LGC-46(WT)(juEx6858)
CZ23504	lgc-46(ok2900)III; Plgc-46-LGC-46(M314I)(juEx6859)
CZ22616	lgc-46(ju825) III ; acc-1(tm3268) IV	tm3268: 241 bp deletion and 4 bp insertion
CZ22617	lgc-46(ju825) III ; acc-2(ok2216) IV	ok2216: 1749 bp deletion and 14 bp insertion
CZ22809	lgc-46(ju825) III ; acc-3(tm3174) X	tm3174: 283 bp deletion
CZ23751	lgc-46(ju825) III acc-4(ok2371)III	ok2371: 1981 bp deletion
CZ20425	lgc-46(ju825)III; lgc-47(ok2963)X	ok2963: 521 bp deletion
CZ23703	lgc-46(ju825)III; lgc-49(tm6556)V	tm6556: 725 bp deletion
CZ23809	lgc-46(ju825)III; lgc-48(gk961621)V	gk961621: 212 bp deletion
CZ23752	lgc-46(ju825) acc-4(ok2371)III; acr-2(n2420)X
CZ23180	acc-4(ok2371)III; acr-2(n2420)
CZ23179	lgc-46(ok2900)III acc-4(ok2371)III; acr-2(n2420)
CZ23790	lgc-46(ju825) acc-4(ok2371)III; acr-2(n2420)X; Pacc-4-acc-4(genomic)(juEx7251)	juEx7251: Pacc-4-acc-4(genomic)(pCZGY2866) 5ng/µl, Pmyo-2::mCherry 1ng/µl
CZ23788	lgc-46(ju825) acc-4(ok2371)III; acr-2(n2420)X; Punc-17β-acc-4cDNA(juEx7249)	juEx7249: Punc-17β-acc-4cDNA(pCZGY2865) 5ng/µl, Pmyo-2::mCherry 1ng/µl
CZ22748	lgc-46(ju825) III ; acc-4(ok2371) III ; acr-2(n2420) X ; Punc-17β-acc-4::GFP(juEx7437)	juEx7437: Punc-17β-acc-4cDNA(pSK278) 5ng/µl, Pmyo-2::mCherry 1ng/µl
CZ19997	Punc-129-RAB-3::mCherry(tauIs46)
CZ23973	lgc-46(ok2900)III; Punc-129-RAB-3::mCherry(tauIs46)
CZ23974	lgc-46(ju825)III; Punc-129-RAB-3::mCherry(tauIs46)
CZ24071	acc-4(ok2371)III; Punc-17b-LGC-46(WT)::GFP(juSi295)IV
CZ24073	acc-4(ok2371)III; Punc-17b-LGC-46(M314I)::GFP(juSi282)IV
CZ22502	Pitr-1-LGC-46(WT)::GFP(juEx6843)	juEx6843: Pitr-1-LGC-46(WT)::GFP(pCZGY2830) 5ng/µl, Pmyo-2::mCherry 1ng/µl
CZ22504	Pitr-1-LGC-46(M314I)::GFP(juEx6845)	juEx6845: Pitr-1-LGC-46(M314I)::GFP(pCZGY2831) 5ng/µl, Pmyo-2::mCherry 1ng/µl
CZ23594	Punc-17β-LGC-46(WT)::GFP(juSi295)IV; acr-2(n2420)X
CZ23489	Punc-17β-LGC-46(M314I)::GFP(juSi282)IV; acr-2(n2420)X
CZ23753	Punc-17β-LGC-46(WT)::GFP(juSi295)IV; Pacr-2-RAB-3::mCherry(juEx7053)	juEx7053: Pacr-2-RAB-3::mCherry(pCZGY1008) 5ng/µl, Pmyo-2::mCherry 1ng/µl
CZ23810	Punc-17β-LGC-46(M314I)::GFP(juSi282)IV; Pacr-2::RAB-3::mCherry(juEx7053)
Information on tm, ok and gk alleles came from Wormbase web site www.wormbase.org and Caenorhabditis Genetics Center (CGC) www.cbs.umn.edu/CGC/
