# Supplementary figures and images for: Release-dependent feedback inhibition by a presynaptically localized ligand-gated anion channel
Source: eLife journal article supplement (doi:10.7554/elife.21734), 2016-10-26

Figure 1-figure supplement 1

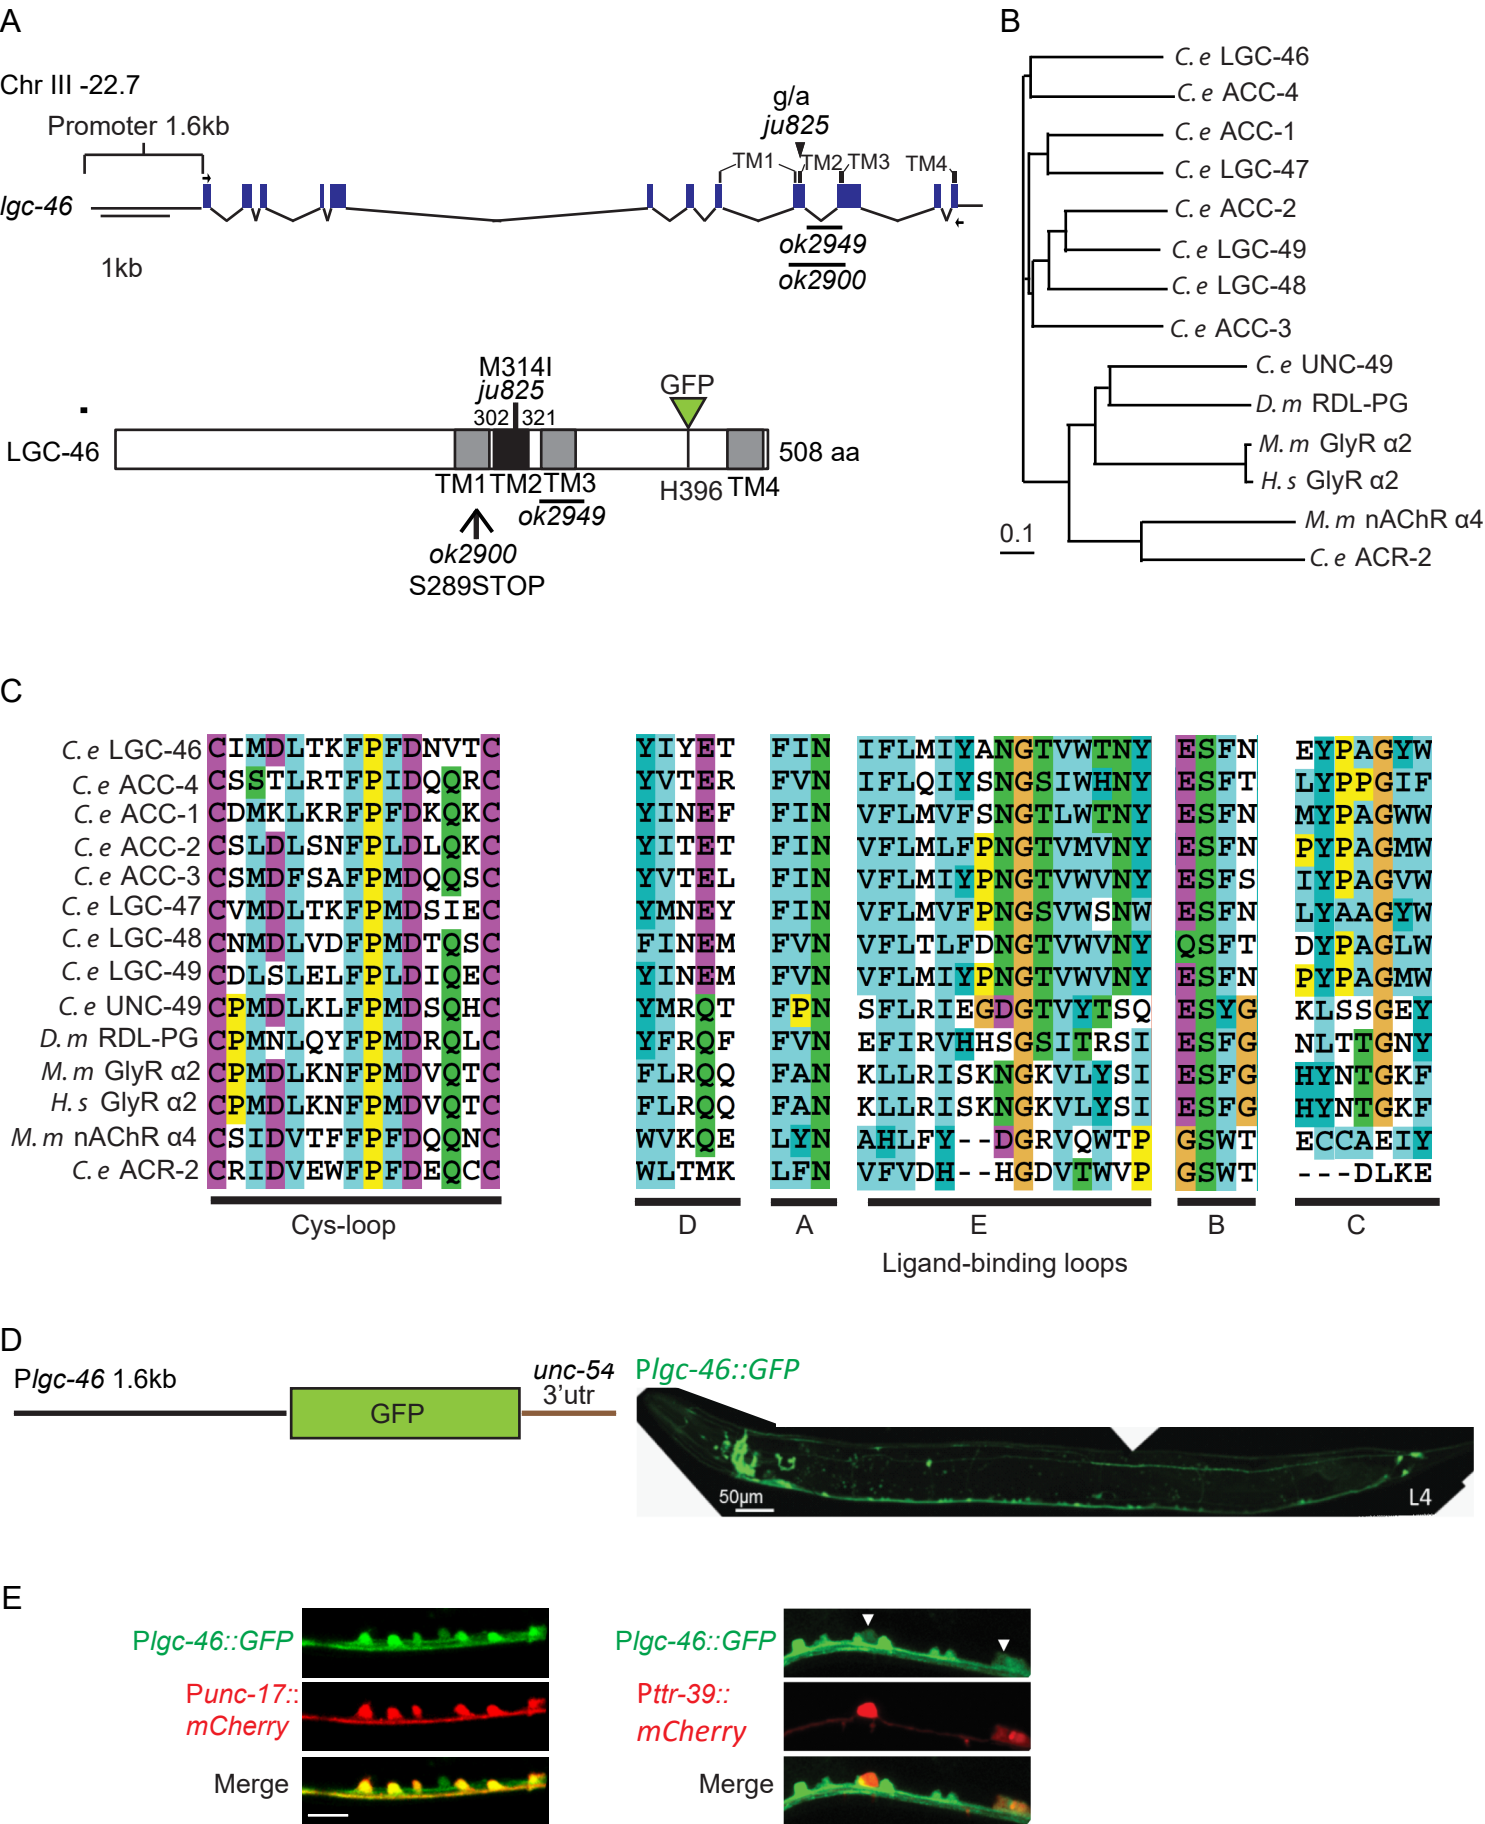

Supplement: supp [file elife_poa_e21734_Figure_1_figure_supplement_1.pdf › elife_poa_e21734_Figure_1_figure_supplement_1.pdf]

Figure 2-figure supplement 1

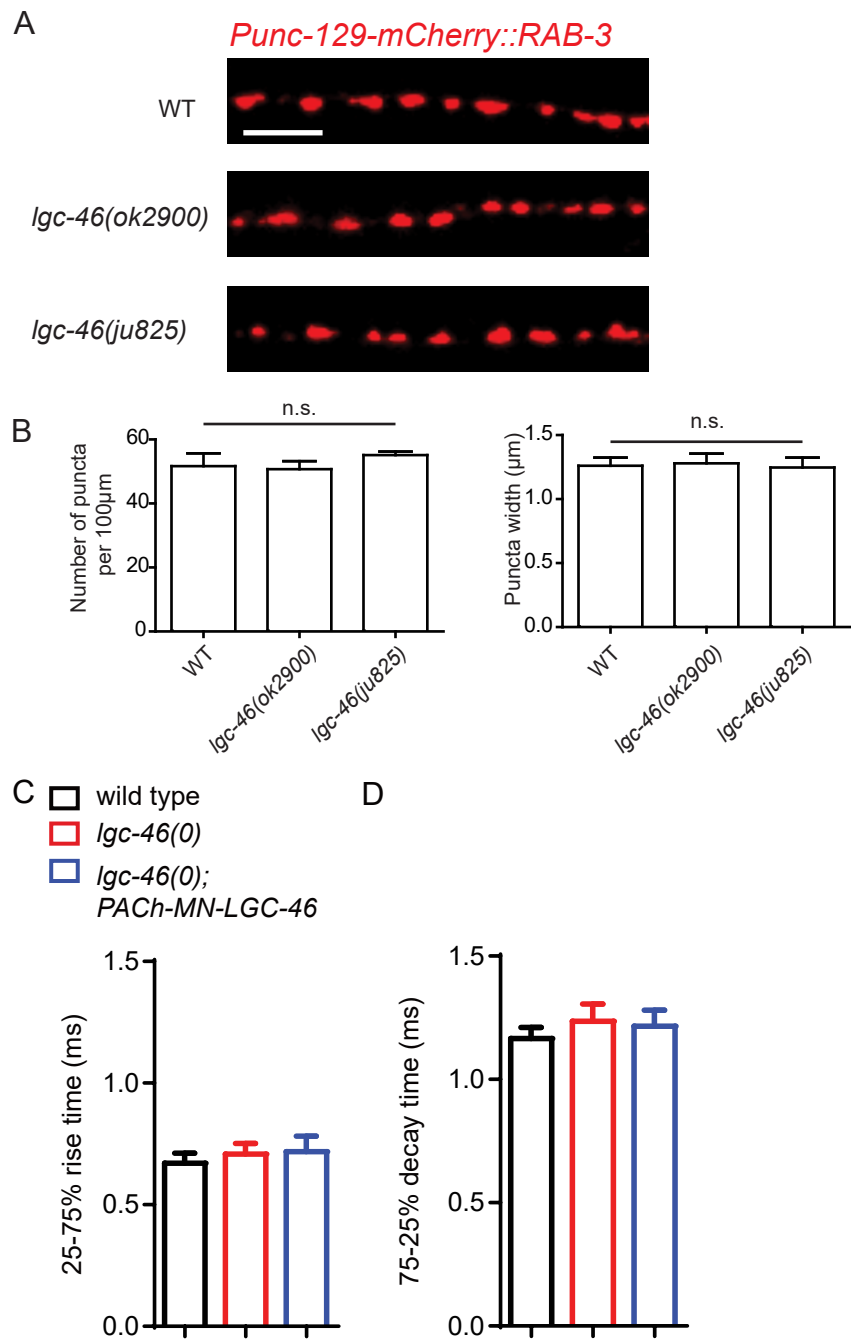

Supplement: supp [file elife_poa_e21734_Figure_2_figure_supplement_1.pdf › elife_poa_e21734_Figure_2_figure_supplement_1.pdf]

Figure 3-figure supplement 1

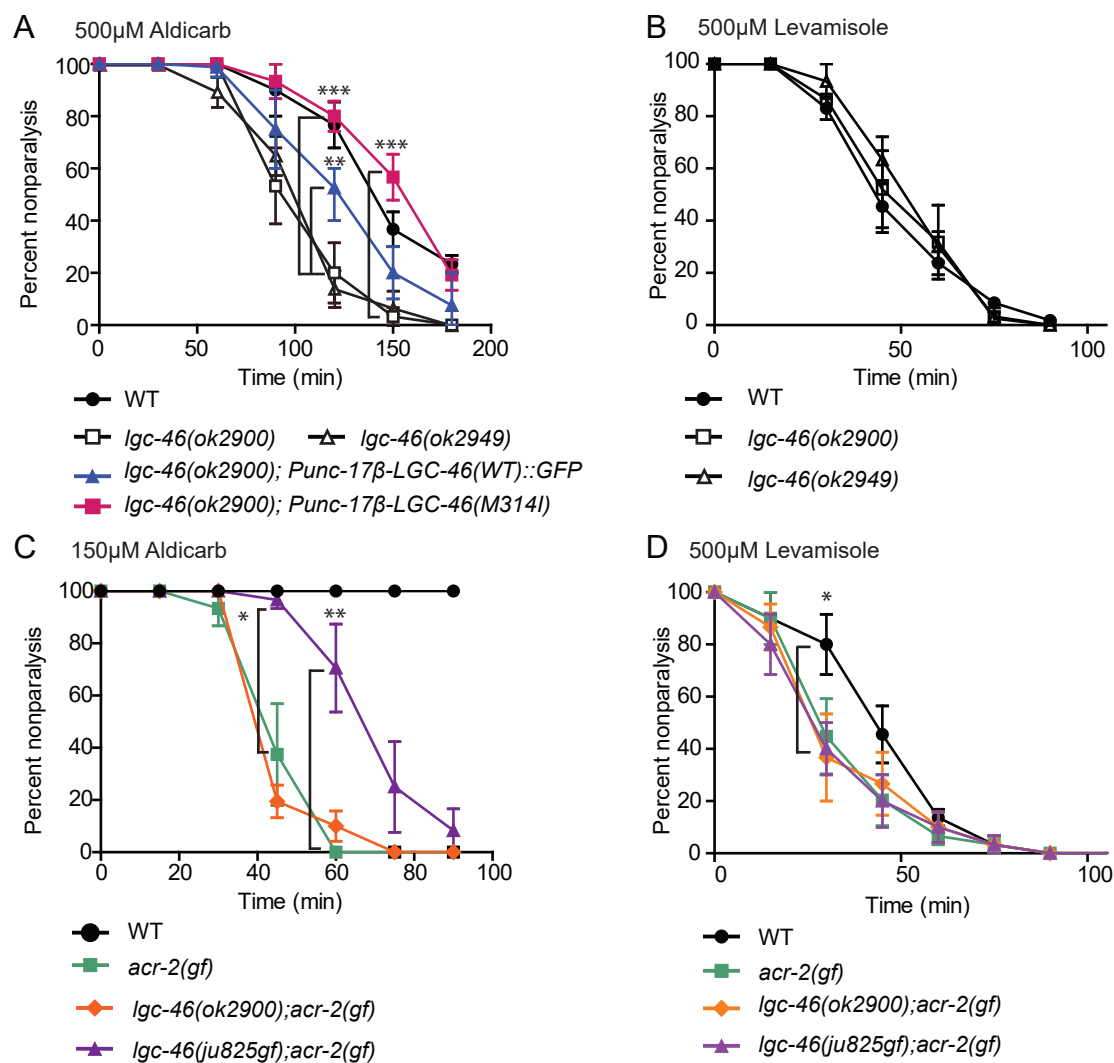

Supplement: supp [file elife_poa_e21734_Figure_3_figure_supplement_1.pdf › elife_poa_e21734_Figure_3_figure_supplement_1.pdf]

Figure 4-figure supplement 1

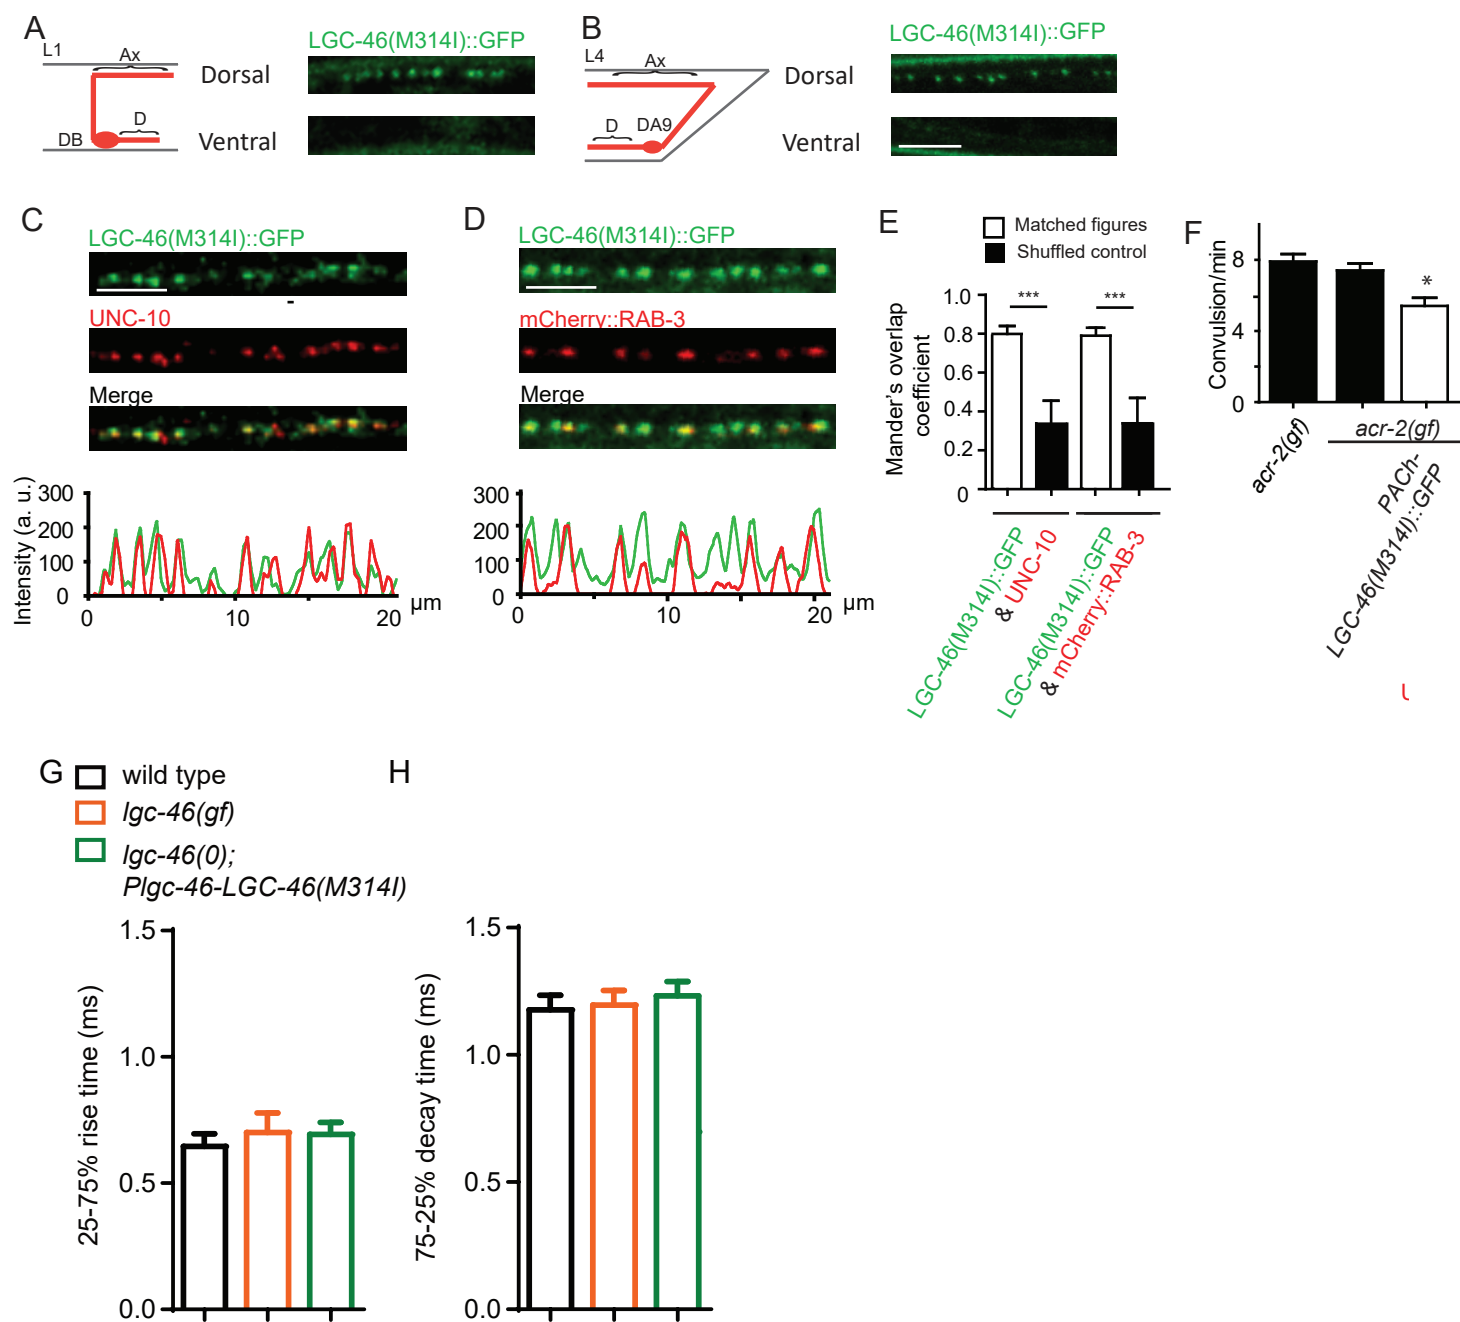

Supplement: supp [file elife_poa_e21734_Figure_4_figure_supplement_1.pdf › elife_poa_e21734_Figure_4_figure_supplement_1.pdf]
